# Supplementary material for: The burden of medication overuse headache and patterns of switching and discontinuation among triptan users: a systematic literature review
Source: PubMed Central journal article supplement (PMC8561931; doi:10.1186/s12883-021-02451-x), 2021-11-02
Supplement: 12883_2021_2451_MOESM1_ESM.pdf [file 12883_2021_2451_MOESM1_ESM.pdf]

## **Supplemental materials**

**Title:** The burden of medication overuse headache and patterns of switching and discontinuation among triptan users: A systematic literature review

**Authors:** Alison M Deighton, BAsC<sup>1</sup>; Linda A Harris, MPH<sup>2</sup>; Karissa Johnston, PhD<sup>1</sup>; Shomari Hogan, MD;<sup>2</sup>Lynn A Quaranta, PharmD;<sup>2</sup> Gilbert L'Italien, PhD;<sup>2</sup> Vlad Coric, MD<sup>2</sup>

<sup>1</sup>Broadstreet HEOR, 201-343 Railway St, Vancouver BC, Canada

<sup>2</sup>Biohaven Pharmaceuticals, 215 Church Street, New Haven CT, USA

**Suppl Table 1. Search Strategy**

| Topic                           | Order                               | Search term                                                                                                                                                                                                                                      | Results   |
|---------------------------------|-------------------------------------|--------------------------------------------------------------------------------------------------------------------------------------------------------------------------------------------------------------------------------------------------|-----------|
| MEDLINE - Population            | 1                                   | exp Migraine Disorders/                                                                                                                                                                                                                          | 85,394    |
|                                 | 2                                   | (migrain* or headache* or cephalgi* or cephalagi*).ti,ab.                                                                                                                                                                                        | 244,906   |
|                                 | 3                                   | 1 or 2                                                                                                                                                                                                                                           | 260,002   |
| MEDLINE - Treatments            | 4                                   | exp Serotonin 5-HT1 Receptor Agonists/                                                                                                                                                                                                           | 6,903     |
|                                 | 5                                   | (triptan* or tryptamine*).mp.                                                                                                                                                                                                                    | 21,355    |
|                                 | 6                                   | exp sumatriptan/                                                                                                                                                                                                                                 | 10,936    |
|                                 | 7                                   | (sumatriptan or treximet or Imitrex or Imigran or Alsuma or Adracon or Altaxa or Apigrane or Cinie or Frimig or Illument or Imigen or Imigrane or Migralgin or Migraneitor or Nazdav or Sapphirex or Sumatran or Sumax or Suminat or Youshu).mp. | 12,769    |
|                                 | 8                                   | (zolmitriptan or zomig or flezol or zomigoro or AscoTop).mp.                                                                                                                                                                                     | 3,491     |
|                                 | 9                                   | (rizatriptan or Maxalt).mp.                                                                                                                                                                                                                      | 2,884     |
|                                 | 10                                  | (eletriptan or relpax).mp.                                                                                                                                                                                                                       | 1,696     |
|                                 | 11                                  | (naratriptan or Amerge or Naramig or Colatan).mp.                                                                                                                                                                                                | 2,017     |
|                                 | 12                                  | (frovatriptan or Frova or Frovelan or Allegro).mp.                                                                                                                                                                                               | 2,016     |
|                                 | 13                                  | (almotriptan or axert or almogran).mp.                                                                                                                                                                                                           | 1,490     |
|                                 | 14                                  | exp ergotamine/                                                                                                                                                                                                                                  | 7,004     |
|                                 | 15                                  | exp dihydroergotamine/                                                                                                                                                                                                                           | 6,413     |
|                                 | 16                                  | (Ergomar or Cafergot or Ergotamin* or Gynergen or Ergostat or dihydroergotamine or ergot*).mp.                                                                                                                                                   | 27,292    |
|                                 | 17                                  | exp Anti-Inflammatory Agents, Non-Steroidal/                                                                                                                                                                                                     | 903,879   |
|                                 | 18                                  | exp ibuprofen/                                                                                                                                                                                                                                   | 56,471    |
|                                 | 19                                  | exp aspirin/                                                                                                                                                                                                                                     | 246,328   |
| 20                              | (ibuprofen or motrin or advil).mp.  | 64,091                                                                                                                                                                                                                                           |           |
| 21                              | excedrin.mp.                        | 362                                                                                                                                                                                                                                              |           |
| 22                              | (NURTEC ODT or BMS-927711).mp.      | 103                                                                                                                                                                                                                                              |           |
| 23                              | (REYVOW or COL-144 or LY573144).mp. | 165                                                                                                                                                                                                                                              |           |
| 24                              | (UBRELVY or MK-1602).mp.            | 85                                                                                                                                                                                                                                               |           |
| 25                              | NXN-188.mp.                         | 30                                                                                                                                                                                                                                               |           |
| 26                              | or/4-25                             | 962,130                                                                                                                                                                                                                                          |           |
| MEDLINE - RCTs                  | 27                                  | (randomized controlled trial or controlled clinical trial).pt.                                                                                                                                                                                   | 574,119   |
|                                 | 28                                  | (randomi#ed or randomly).ti,ab.                                                                                                                                                                                                                  | 1,987,037 |
|                                 | 29                                  | placebo.ab.                                                                                                                                                                                                                                      | 482,595   |
|                                 | 30                                  | clinical trials as topic.sh.                                                                                                                                                                                                                     | 187,705   |
|                                 | 31                                  | trial.ti.                                                                                                                                                                                                                                        | 477,429   |
| MEDLINE - Observational studies | 32                                  | exp case-control studies/ or case?control stud*.mp.                                                                                                                                                                                              | 1,167,766 |
|                                 | 33                                  | exp cohort studies/ or cohort stud*.mp.                                                                                                                                                                                                          | 2,488,618 |
|                                 | 34                                  | exp cross-sectional studies/ or cross?sectional stud*.mp.                                                                                                                                                                                        | 608,762   |

| Topic                                                              | Order | Search term                                                                                                                                                                                                                                      | Results    |
|--------------------------------------------------------------------|-------|--------------------------------------------------------------------------------------------------------------------------------------------------------------------------------------------------------------------------------------------------|------------|
|                                                                    | 35    | exp observational study/ or exp prospective studies/ or exp retrospective studies/ or (observ* stud* or prospective stud* or retrospective stud*).mp.                                                                                            | 2,995,567  |
|                                                                    | 36    | exp epidemiologic studies/ or epidemiologic* stud*.mp.                                                                                                                                                                                           | 5,627,577  |
|                                                                    | 37    | exp follow-up studies/ or follow?up stud*.mp.                                                                                                                                                                                                    | 2,046,104  |
|                                                                    | 38    | exp longitudinal studies/ or longitudinal stud*.mp.                                                                                                                                                                                              | 320,971    |
| MEDLINE -<br>Included study<br>designs                             | 39    | or/27-38                                                                                                                                                                                                                                         | 10,002,615 |
|                                                                    | 40    | letter/                                                                                                                                                                                                                                          | 2,058,565  |
|                                                                    | 41    | editorial/                                                                                                                                                                                                                                       | 1,113,206  |
|                                                                    | 42    | news/                                                                                                                                                                                                                                            | 196,084    |
|                                                                    | 43    | exp historical article/                                                                                                                                                                                                                          | 389,523    |
|                                                                    | 44    | anecdotes as topic/                                                                                                                                                                                                                              | 44,017     |
|                                                                    | 45    | comment/                                                                                                                                                                                                                                         | 786,317    |
|                                                                    | 46    | (letter or comment*).ti.                                                                                                                                                                                                                         | 328,955    |
|                                                                    | 47    | animals/ not humans/                                                                                                                                                                                                                             | 5,525,499  |
| MEDLINE -<br>Excluded study<br>designs and<br>publication<br>types | 48    | or/40-47                                                                                                                                                                                                                                         | 9,585,759  |
|                                                                    | 49    | 3 and 26 and 39                                                                                                                                                                                                                                  | 11,012     |
|                                                                    | 50    | 49 not 48                                                                                                                                                                                                                                        | 10,737     |
|                                                                    | 51    | 50 use ppezv                                                                                                                                                                                                                                     | 2,593      |
| Embase -<br>Population                                             | 52    | exp Migraine/                                                                                                                                                                                                                                    | 85,394     |
|                                                                    | 53    | (migrain* or headache* or cephalgi* or cephalalgi*).ti,ab.                                                                                                                                                                                       | 244,906    |
|                                                                    | 54    | 52 or 53                                                                                                                                                                                                                                         | 260,002    |
| Embase -<br>treatments                                             | 55    | exp serotonin 1 agonist/                                                                                                                                                                                                                         | 1,269      |
|                                                                    | 56    | exp triptan derivative/                                                                                                                                                                                                                          | 3,331      |
|                                                                    | 57    | (triptan* or tryptamine*).mp.                                                                                                                                                                                                                    | 21,355     |
|                                                                    | 58    | exp sumatriptan/                                                                                                                                                                                                                                 | 10,936     |
|                                                                    | 59    | exp naproxen plus sumatriptan succinate/                                                                                                                                                                                                         | 42         |
|                                                                    | 60    | (sumatriptan or treximet or Imitrex or Imigran or Alsuma or Adracon or Altaxa or Apigrane or Cinie or Frimig or Illument or Imigen or Imigrane or Migralgin or Migraneitor or Nazdav or Sapphires or Sumatran or Sumax or Suminat or Youshu).mp. | 12,769     |
|                                                                    | 61    | exp zolmitriptan/                                                                                                                                                                                                                                | 2,822      |
|                                                                    | 62    | (zolmitriptan or zomig or flezol or zomigoro or AscoTop).mp.                                                                                                                                                                                     | 3,491      |
|                                                                    | 63    | exp rizatriptan/                                                                                                                                                                                                                                 | 2,337      |
|                                                                    | 64    | (rizatriptan or Maxalt).mp.                                                                                                                                                                                                                      | 2,884      |
|                                                                    | 65    | exp eletriptan/                                                                                                                                                                                                                                  | 1,378      |
|                                                                    | 66    | (eletriptan or relpax).mp.                                                                                                                                                                                                                       | 1,696      |
|                                                                    | 67    | exp naratriptan/                                                                                                                                                                                                                                 | 1,657      |
|                                                                    | 68    | (naratriptan or Amerge or Naramig or Colatan).mp.                                                                                                                                                                                                | 2,017      |

| Topic                           | Order | Search term                                                                                                                                                                                                                                                                                                | Results   |
|---------------------------------|-------|------------------------------------------------------------------------------------------------------------------------------------------------------------------------------------------------------------------------------------------------------------------------------------------------------------|-----------|
|                                 | 69    | exp frovatriptan/                                                                                                                                                                                                                                                                                          | 978       |
|                                 | 70    | (frovatriptan or Frova or Frovelan or Allegro).mp.                                                                                                                                                                                                                                                         | 2,016     |
|                                 | 71    | exp almotriptan/                                                                                                                                                                                                                                                                                           | 1,186     |
|                                 | 72    | (almotriptan or axert or almogran).mp.                                                                                                                                                                                                                                                                     | 1,490     |
|                                 | 73    | exp ergot derivative/                                                                                                                                                                                                                                                                                      | 882       |
|                                 | 74    | exp ergotamine/                                                                                                                                                                                                                                                                                            | 7,004     |
|                                 | 75    | exp dihydroergotamine/                                                                                                                                                                                                                                                                                     | 6,413     |
|                                 | 76    | (Ergomar or Cafergot or Ergotamin* or Gynergen or Ergostat or dihydroergotamine or ergot*).mp.                                                                                                                                                                                                             | 27,292    |
|                                 | 77    | exp nonsteroid antiinflammatory agent/                                                                                                                                                                                                                                                                     | 704,982   |
|                                 | 78    | exp ibuprofen/                                                                                                                                                                                                                                                                                             | 56,471    |
|                                 | 79    | exp acetylsalicylic acid/                                                                                                                                                                                                                                                                                  | 246,328   |
|                                 | 80    | (ibuprofen or motrin or advil).mp.                                                                                                                                                                                                                                                                         | 64,091    |
|                                 | 81    | exp acetylsalicylic acid plus caffeine plus paracetamol/                                                                                                                                                                                                                                                   | 8         |
|                                 | 82    | excedrin.mp.                                                                                                                                                                                                                                                                                               | 362       |
|                                 | 83    | exp NURTEC ODT/                                                                                                                                                                                                                                                                                            | 61        |
|                                 | 84    | (NURTEC ODT or BMS-927711).mp.                                                                                                                                                                                                                                                                             | 103       |
|                                 | 85    | exp REYVOW/                                                                                                                                                                                                                                                                                                | 108       |
|                                 | 86    | (REYVOW or COL-144 or LY573144).mp.                                                                                                                                                                                                                                                                        | 165       |
|                                 | 87    | exp UBRELVY/                                                                                                                                                                                                                                                                                               | 62        |
|                                 | 88    | (UBRELVY or MK-1602).mp.                                                                                                                                                                                                                                                                                   | 85        |
|                                 | 89    | NXN-188.mp.                                                                                                                                                                                                                                                                                                | 30        |
|                                 | 90    | or/55-89                                                                                                                                                                                                                                                                                                   | 813,464   |
| Embase - RCTs                   | 91    | random*.ti,ab.                                                                                                                                                                                                                                                                                             | 2,494,896 |
|                                 | 92    | factorial*.ti,ab.                                                                                                                                                                                                                                                                                          | 63,624    |
|                                 | 93    | (crossover* or cross?over*).ti,ab.                                                                                                                                                                                                                                                                         | 132,251   |
|                                 | 94    | ((doubl* or singl*) adj blind*).ti,ab.                                                                                                                                                                                                                                                                     | 382,155   |
|                                 | 95    | (assign* or allocat* or volunteer* or placebo*).ti,ab.                                                                                                                                                                                                                                                     | 1,723,352 |
|                                 | 96    | crossover procedure/                                                                                                                                                                                                                                                                                       | 59,948    |
|                                 | 97    | double blind procedure/                                                                                                                                                                                                                                                                                    | 162,979   |
|                                 | 98    | single blind procedure/                                                                                                                                                                                                                                                                                    | 35,862    |
|                                 | 99    | randomized controlled trial/                                                                                                                                                                                                                                                                               | 1,045,475 |
| Embase - Observational studies  | 100   | exp case control study/ or exp cohort analysis/ or exp cross-sectional study/ or exp observational study/ or (epidemiolog* stud* or case?control stud* or cohort stud* or cohort analys* or cross?sectional stud* or observ* stud* or follow?up stud* or longitudinal or prospective or retrospective).mp. | 5,894,695 |
| Embase - Included study designs | 101   | or/91-100                                                                                                                                                                                                                                                                                                  | 8,955,506 |
|                                 | 102   | letter.pt. or letter/                                                                                                                                                                                                                                                                                      | 2,116,537 |
|                                 | 103   | note.pt.                                                                                                                                                                                                                                                                                                   | 763,447   |
|                                 | 104   | editorial.pt.                                                                                                                                                                                                                                                                                              | 1,121,846 |
|                                 | 105   | (letter or comment*).ti.                                                                                                                                                                                                                                                                                   | 328,955   |
|                                 | 106   | animal/ not human/                                                                                                                                                                                                                                                                                         | 5,609,523 |

| Topic                                                 | Order | Search term                                                                       | Results      |
|-------------------------------------------------------|-------|-----------------------------------------------------------------------------------|--------------|
| Embase - Excluded study designs and publication types | 107   | or/102-106                                                                        | 9,679,892    |
|                                                       | 108   | 54 and 90 and 101                                                                 | 8,194        |
|                                                       | 109   | 108 not 107                                                                       | 8,021        |
|                                                       | 110   | 109 use omezid                                                                    | 5,982        |
| Combined                                              | 111   | 51 or 110                                                                         | 8,575        |
|                                                       | 112   | limit 111 to english language                                                     | 8,088        |
|                                                       | 113   | limit 112 to human\$                                                              | 7,583        |
|                                                       | 114   | limit 113 to "review articles" [Limit not valid in Embase; records were retained] | <b>5,769</b> |

**Database searched:** Embase/Medline

**Search date:** July 22, 2019

### Suppl Table 2. Systematic Review Selection Criteria

|                                  |                                                                                                                                                                                                                                                                                                                                                                                                                                                                                                                                                                                                                                                                                                                                                      |
|----------------------------------|------------------------------------------------------------------------------------------------------------------------------------------------------------------------------------------------------------------------------------------------------------------------------------------------------------------------------------------------------------------------------------------------------------------------------------------------------------------------------------------------------------------------------------------------------------------------------------------------------------------------------------------------------------------------------------------------------------------------------------------------------|
| <b>Population</b>                | Acute migraine, both sexes, age $\geq 18$ years old<br>Subject has at least 1-year history of migraine (with or without aura)                                                                                                                                                                                                                                                                                                                                                                                                                                                                                                                                                                                                                        |
| <b>Interventions/comparators</b> | <p>Triptans, including:</p> <ul style="list-style-type: none"> <li>• Sumatriptan (DFN-11, DFN-02, NP101)</li> <li>• Treximet</li> <li>• Almotriptan</li> <li>• Eletriptan</li> <li>• Frovatriptan</li> <li>• Naratriptan</li> <li>• Rizatriptan</li> <li>• Zolmitriptan</li> </ul> <p>Ergots, including:</p> <ul style="list-style-type: none"> <li>• Ergotamine</li> <li>• Dihydroergotamine (migranal)</li> </ul> <p>Other targeted therapies:</p> <ul style="list-style-type: none"> <li>• NURTEC(TM) ODT</li> <li>• REYVOW™</li> <li>• UBRELVY™ (MK-1602)</li> <li>• NXN-188</li> </ul> <p>Over the counter NSAIDs:</p> <ul style="list-style-type: none"> <li>• Aspirin</li> <li>• Advil</li> <li>• Excedrin</li> </ul> <p>Any intervention</p> |
| <b>Outcomes</b>                  | <p><u>Clinical outcomes</u></p> <p>Treatment efficacy:</p> <ul style="list-style-type: none"> <li>• Pain freedom</li> <li>• Sustained Pain Freedom</li> <li>• Pain relief</li> <li>• Sustained Pain Relief</li> <li>• Freedom from functional disability</li> <li>• Freedom from most bothersome symptom (MBS)</li> <li>• Probability of Requiring Rescue Medication</li> <li>• Subjects self-report "normal" on the functional disability scale</li> <li>• Freedom from Photophobia</li> <li>• Freedom from Phonophobia</li> <li>• Freedom from Nausea</li> </ul>                                                                                                                                                                                   |

|                     |                                                                                                                                                                                                                                                                                                                                                                                                                                                                                                                                                                                                                                                                                                                                                                                                                                                                                                                                                                                                                                                                                                                                                                                                                                                                                                                                                                                                                                                                                                                                                                                                                                                                                                                                          |
|---------------------|------------------------------------------------------------------------------------------------------------------------------------------------------------------------------------------------------------------------------------------------------------------------------------------------------------------------------------------------------------------------------------------------------------------------------------------------------------------------------------------------------------------------------------------------------------------------------------------------------------------------------------------------------------------------------------------------------------------------------------------------------------------------------------------------------------------------------------------------------------------------------------------------------------------------------------------------------------------------------------------------------------------------------------------------------------------------------------------------------------------------------------------------------------------------------------------------------------------------------------------------------------------------------------------------------------------------------------------------------------------------------------------------------------------------------------------------------------------------------------------------------------------------------------------------------------------------------------------------------------------------------------------------------------------------------------------------------------------------------------------|
|                     | <ul style="list-style-type: none"> <li>• Pain relapse</li> <li>• Liver function tests (ALT/AST)</li> </ul> <p>Treatment safety:</p> <ul style="list-style-type: none"> <li>• Adverse events (AEs)</li> <li>• Serious adverse events (SAEs)</li> <li>• Nausea, vomiting</li> <li>• Dizziness</li> <li>• Fatigue/ malaise/somnolence</li> <li>• Sensory disturbance</li> <li>• Cardiovascular/cerebrovascular outcomes</li> <li>• Chest pain</li> <li>• Medication overuse headache</li> <li>• Return to function</li> </ul> <p>Subgroups</p> <ul style="list-style-type: none"> <li>• Triptan refractory population</li> </ul> <p><u>Epidemiology outcomes</u></p> <p>Population characteristics</p> <ul style="list-style-type: none"> <li>• Age</li> <li>• Sex</li> <li>• Region</li> <li>• Comorbidities (including cardiovascular disease)</li> </ul> <p>Clinical outcomes</p> <ul style="list-style-type: none"> <li>• Treatment safety</li> <li>• Cardiovascular/cerebrovascular outcomes</li> <li>• Medication overuse headache</li> <li>• Treatment patterns</li> <li>• Return to function</li> <li>• Risk of chronic migraine <ul style="list-style-type: none"> <li>○ Inadequate acute treatment and onset of chronic migraines</li> </ul> </li> <li>• Headache frequency</li> </ul> <p>Economic outcomes</p> <ul style="list-style-type: none"> <li>• Direct medical costs</li> <li>• Indirect costs and lost work productivity <ul style="list-style-type: none"> <li>○ Days missed from work</li> <li>○ Work-related disability</li> </ul> </li> </ul> <p>Quality of life outcomes</p> <ul style="list-style-type: none"> <li>• HRQoL <ul style="list-style-type: none"> <li>○ PRO</li> <li>○ Utility</li> </ul> </li> </ul> |
| <b>Study design</b> | Randomized controlled trials<br>Epidemiologic (prospective or retrospective) studies                                                                                                                                                                                                                                                                                                                                                                                                                                                                                                                                                                                                                                                                                                                                                                                                                                                                                                                                                                                                                                                                                                                                                                                                                                                                                                                                                                                                                                                                                                                                                                                                                                                     |

**Suppl Table 3. STROBE statement recommendation checklist**

| Section            | Item No | Recommendation                                                                                                                                                                                |
|--------------------|---------|-----------------------------------------------------------------------------------------------------------------------------------------------------------------------------------------------|
| Title and abstract | 1       | (a) Indicate the study's design with a commonly used term in the title or the abstract<br>(b) Provide in the abstract an informative and balanced summary of what was done and what was found |
| Introduction       |         |                                                                                                                                                                                               |
| Background         | 2       | Explain the scientific background and rationale for the investigation being reported                                                                                                          |
| Objectives         | 3       | State specific objectives, including any pre-specified hypotheses                                                                                                                             |
| Methods            |         |                                                                                                                                                                                               |
| Study design       | 4       | Present key elements of study design early in the paper                                                                                                                                       |

| Section                  | Item No | Recommendation                                                                                                                                                                                                                                                                                                                                                                                                                                                                                                                                                                                                                                                                                                     |
|--------------------------|---------|--------------------------------------------------------------------------------------------------------------------------------------------------------------------------------------------------------------------------------------------------------------------------------------------------------------------------------------------------------------------------------------------------------------------------------------------------------------------------------------------------------------------------------------------------------------------------------------------------------------------------------------------------------------------------------------------------------------------|
| Setting                  | 5       | Describe the setting, locations, and relevant dates, including periods of recruitment, exposure, follow-up, and data collection                                                                                                                                                                                                                                                                                                                                                                                                                                                                                                                                                                                    |
| Participants             | 6       | <p>(a) <i>Cohort study</i>—Give the eligibility criteria, and the sources and methods of selection of participants. Describe methods of follow-up</p> <p><i>Case-control study</i>—Give the eligibility criteria, and the sources and methods of case ascertainment and control selection. Give the rationale for the choice of cases and controls</p> <p><i>Cross-sectional study</i>—Give the eligibility criteria, and the sources and methods of selection of participants</p> <p>(b) <i>Cohort study</i>—For matched studies, give matching criteria and number of exposed and unexposed</p> <p><i>Case-control study</i>—For matched studies, give matching criteria and the number of controls per case</p> |
| Variables                | 7       | Clearly define all outcomes, exposures, predictors, potential confounders, and effect modifiers. Give diagnostic criteria, if applicable                                                                                                                                                                                                                                                                                                                                                                                                                                                                                                                                                                           |
| Data sources/measurement | 8       | For each variable of interest, give sources of data and details of methods of assessment (measurement). Describe comparability of assessment methods if there is more than one group                                                                                                                                                                                                                                                                                                                                                                                                                                                                                                                               |
| Bias                     | 9       | Describe any efforts to address potential sources of bias                                                                                                                                                                                                                                                                                                                                                                                                                                                                                                                                                                                                                                                          |
| Study size               | 10      | Explain how the study size was arrived at                                                                                                                                                                                                                                                                                                                                                                                                                                                                                                                                                                                                                                                                          |
| Quantitative variables   | 11      | Explain how quantitative variables were handled in the analyses. If applicable, describe which groupings were chosen and why                                                                                                                                                                                                                                                                                                                                                                                                                                                                                                                                                                                       |
| Statistical methods      | 12      | <p>(a) Describe all statistical methods, including those used to control for confounding</p> <p>(b) Describe any methods used to examine subgroups and interactions</p> <p>(c) Explain how missing data were addressed</p> <p>(d) <i>Cohort study</i>—If applicable, explain how loss to follow-up was addressed</p> <p><i>Case-control study</i>—If applicable, explain how matching of cases and controls was addressed</p> <p><i>Cross-sectional study</i>—If applicable, describe analytical methods taking account of sampling strategy</p> <p>(e) Describe any sensitivity analyses</p>                                                                                                                      |
| <b>Results</b>           |         |                                                                                                                                                                                                                                                                                                                                                                                                                                                                                                                                                                                                                                                                                                                    |
| Participants             | 13      | (a) Report numbers of individuals at each stage of study—e.g. numbers potentially eligible,                                                                                                                                                                                                                                                                                                                                                                                                                                                                                                                                                                                                                        |

| Section           | Item No | Recommendation                                                                                                                                                                                                                                                                                                                                                                                                                 |
|-------------------|---------|--------------------------------------------------------------------------------------------------------------------------------------------------------------------------------------------------------------------------------------------------------------------------------------------------------------------------------------------------------------------------------------------------------------------------------|
|                   |         | <p>examined for eligibility, confirmed eligible, included in the study, completing follow-up, and analyzed</p> <p>(b) Give reasons for non-participation at each stage</p> <p>(c) Consider use of a flow diagram</p>                                                                                                                                                                                                           |
| Descriptive data  | 14      | <p>(a) Give characteristics of study participants (e.g. demographic, clinical, social) and information on exposures and potential confounders</p> <p>(b) Indicate number of participants with missing data for each variable of interest</p> <p>(c) Cohort study—Summarize follow-up time (e.g., average and total amount)</p>                                                                                                 |
| Outcome data      | 15      | <p><i>Cohort study</i>—Report numbers of outcome events or summary measures over time</p> <p><i>Case-control study</i>—Report numbers in each exposure category, or summary measures of exposure</p> <p><i>Cross-sectional study</i>—Report numbers of outcome events or summary measures</p>                                                                                                                                  |
| Main results      | 16      | <p>(a) Give unadjusted estimates and, if applicable, confounder-adjusted estimates and their precision (e.g., 95% confidence interval). Make clear which confounders were adjusted for and why they were included</p> <p>(b) Report category boundaries when continuous variables were categorized</p> <p>(c) If relevant, consider translating estimates of relative risk into absolute risk for a meaningful time period</p> |
| Other analyses    | 17      | <p>Report other analyses done—e.g. analyses of subgroups and interactions, and sensitivity</p> <p>Analyses</p>                                                                                                                                                                                                                                                                                                                 |
| Discussion        |         |                                                                                                                                                                                                                                                                                                                                                                                                                                |
| Key results       | 18      | Summarize key results with reference to study objective                                                                                                                                                                                                                                                                                                                                                                        |
| Limitations       | 19      | <p>Discuss limitations of the study, taking into account sources of potential bias or imprecision.</p> <p>Discuss both direction and magnitude of any potential bias</p>                                                                                                                                                                                                                                                       |
| Interpretation    | 20      | Give a cautious overall interpretation of results considering objectives, limitations, multiplicity of analyses, results from similar studies, and other relevant evidence                                                                                                                                                                                                                                                     |
| Generalizability  | 21      | Discuss the generalizability (external validity) of the study results                                                                                                                                                                                                                                                                                                                                                          |
| Other Information |         |                                                                                                                                                                                                                                                                                                                                                                                                                                |
| Funding           | 22      | Give the source of funding and the role of the funders for the present study and, if applicable, for the original study on which the present article is based                                                                                                                                                                                                                                                                  |

**Suppl Table 4. Quality assessment using STROBE**



| Citation                                                     | STROBE Item Number |    |   |   |   |   |    |    |   |   |   |    |    |     |     |     |     |     |
|--------------------------------------------------------------|--------------------|----|---|---|---|---|----|----|---|---|---|----|----|-----|-----|-----|-----|-----|
|                                                              | 1a                 | 1b | 2 | 3 | 4 | 5 | 6a | 6b | 7 | 8 | 9 | 10 | 11 | 12a | 12b | 12c | 12d | 12e |
| Articles reporting on treatment patterns among triptan users |                    |    |   |   |   |   |    |    |   |   |   |    |    |     |     |     |     |     |
| Chen, 2014(36)                                               | Y                  | Y  | Y | Y | Y | Y | Y  | -- | Y | Y | N | Y  | N  | Y   | N   | N   | N   | N   |
| Lombard, 2018(39)*                                           | Y                  | Y  |   |   |   |   |    |    |   |   |   |    |    |     |     |     |     |     |
| Ng-Mak, 2012(40)                                             | Y                  | Y  | Y | Y | Y | Y | Y  | -- | Y | Y | N | Y  | N  | Y   | N   | N   | N   | N   |
| Alam, 2018(35)*                                              | N                  | Y  |   |   |   |   |    |    |   |   |   |    |    |     |     |     |     |     |
| Fischer, 2016(37)                                            | Y                  | Y  | Y | Y | Y | Y | Y  | -- | Y | Y | N | Y  | Y  | Y   | Y   | N   | N   | N   |
| Serrano, 2013(41)                                            | N                  | Y  | Y | Y | Y | Y | Y  | -- | Y | Y | N | Y  | Y  | Y   | Y   | N   | N   | N   |
| Katic, 2011(38)                                              | Y                  | Y  | Y | Y | Y | Y | Y  | -- | Y | Y | N | Y  | N  | Y   | Y   | N   | N   | N   |
| Articles reporting on MOH among triptan users                |                    |    |   |   |   |   |    |    |   |   |   |    |    |     |     |     |     |     |
| Katsarava et al, 2003(48)                                    | Y                  | Y  | Y | Y | Y | Y | Y  | -- | N | Y | N | Y  | N  | Y   | Y   | N   | N   | N   |
| Kluo--itis et al, 2017(49)                                   | Y                  | Y  | Y | Y | Y | Y | Y  | -- | Y | Y | N | Y  | -- | Y   | Y   | N   | N   | N   |
| Limmroth et al, 2002(51)                                     | Y                  | Y  | Y | Y | Y | Y | Y  | -- | Y | Y | N | Y  | -- | Y   | Y   | N   | N   | N   |
| Zeeberg et al, 2006(53)                                      | N                  | Y  | Y | Y | N | Y | Y  | -- | Y | Y | Y | Y  | -- | Y   | Y   | N   | N   | N   |
| Benz et al, 2017(42)                                         | Y                  | Y  | Y | Y | Y | Y | Y  | -- | Y | Y | N | Y  | Y  | Y   | Y   | Y   | N   | N   |
| Creac'h et al, 2009(44)                                      | Y                  | Y  | Y | Y | Y | Y | Y  | -- | Y | Y | N | Y  | -- | Y   | Y   | N   | N   | N   |
| de Rijk et al, 2018(45)                                      | N                  | Y  | Y | Y | Y | Y | Y  | -- | Y | Y | N | Y  | N  | Y   | Y   | N   | Y   | N   |
| Grande et al, 2011(46)                                       | Y                  | Y  | Y | Y | Y | Y | Y  | -- | Y | Y | N | Y  | Y  | Y   | Y   | N   | N   | N   |
| Imai et al, 2007(47)                                         | Y                  | Y  | Y | Y | N | N | Y  | -- | Y | Y | N | N  | N  | Y   | Y   | N   | N   | N   |
| Lake et al, 2009(50)                                         | Y                  | Y  | Y | Y | N | Y | Y  | -- | Y | Y | N | Y  | Y  | Y   | N   | N   | N   | N   |
| Radat et al, 2005(52)                                        | Y                  | Y  | Y | Y | Y | Y | Y  | N  | Y | Y | N | Y  | N  | N   | N   | N   | N   | N   |
| Zidverc-Trajkovic et al, 2007(54)                            | Y                  | Y  | Y | Y | Y | Y | Y  | -- | Y | Y | N | Y  | N  | Y   | Y   | N   | N   | N   |
| Chagas, 2015(43)                                             | N                  | Y  | Y | Y | Y | Y | Y  | -- | Y | Y | N | Y  | N  | N   | N   | N   | N   | N   |

**Note:** \*abstract only

| Citation                                                     | STROBE Item Number |     |     |     |     |     |    |     |     |     |    |    |    |    |    |    |
|--------------------------------------------------------------|--------------------|-----|-----|-----|-----|-----|----|-----|-----|-----|----|----|----|----|----|----|
|                                                              | 13a                | 13b | 13c | 14a | 14b | 14c | 15 | 16a | 16b | 16c | 17 | 18 | 19 | 20 | 21 | 22 |
| Articles reporting on treatment patterns among triptan users |                    |     |     |     |     |     |    |     |     |     |    |    |    |    |    |    |
| Chen, 2014(36)                                               | N                  | N   | N   | Y   | N   | Y   | Y  | Y   | --  | --  | Y  | Y  | Y  | Y  | Y  | Y  |
| Lombard, 2018(39)*                                           |                    |     |     |     |     |     |    |     |     |     |    |    |    |    |    |    |
| Ng-Mak, 2012(40)                                             | Y                  | Y   | Y   | N   | N   | N   | Y  | N   | --  | N   | N  | Y  | Y  | Y  | Y  | Y  |
| Alam, 2018(35)*                                              |                    |     |     |     |     |     |    |     |     |     |    |    |    |    |    |    |
| Fischer, 2016(37)                                            | Y                  | N   | Y   | Y   | N   | N   | N  | Y   | --  | N   | Y  | Y  | Y  | Y  | Y  | Y  |
| Serrano, 2013(41)                                            | N                  | N   | N   | Y   | N   | N   | N  | Y   | --  | N   | Y  | Y  | Y  | Y  | Y  | Y  |
| Katic, 2011(38)                                              | Y                  | N   | N   | Y   | N   | N   | N  | N   | --  | N   | Y  | Y  | Y  | Y  | Y  | Y  |
| Articles reporting on MOH among triptan users                |                    |     |     |     |     |     |    |     |     |     |    |    |    |    |    |    |
| Katsarava et al, 2003(48)                                    | Y                  | N   | N   | N   | N   | Y   | Y  | N   | --  | N   | -- | Y  | Y  | Y  | Y  | N  |
| Kluo--itis et al, 2017(49)                                   | Y                  | Y   | Y   | Y   | N   | N   | N  | Y   | --  | N   | Y  | Y  | N  | Y  | Y  | N  |
| Limmroth et al, 2002(51)                                     | Y                  | N   | N   | N   | N   | N   | N  | Y   | N   | N   | Y  | Y  | N  | Y  | Y  | N  |
| Zeeberg et al, 2006(53)                                      | N                  | N   | N   | N   | N   | N   | N  | Y   | --  | N   | Y  | Y  | Y  | Y  | Y  | Y  |
| Benz et al, 2017(42)                                         | Y                  | Y   | Y   | Y   | N   | Y   | Y  | Y   | --  | N   | Y  | Y  | Y  | Y  | Y  | N  |
| Creac'h et al, 2009(44)                                      | Y                  | N   | N   | Y   | N   | N   | N  | Y   | --  | N   | Y  | Y  | Y  | Y  | Y  | N  |
| de Rijk et al, 2018(45)                                      | Y                  | Y   | Y   | Y   | N   | N   | N  | Y   | --  | N   | Y  | Y  | Y  | Y  | N  | N  |
| Grande et al, 2011(46)                                       | Y                  | Y   | N   | Y   | N   | Y   | Y  | Y   | --  | N   | Y  | Y  | N  | Y  | Y  | Y  |
| Imai et al, 2007(47)                                         | N                  | N   | N   | Y   | N   | N   | N  | N   | --  | N   | N  | Y  | N  | Y  | N  | N  |
| Lake et al, 2009(50)                                         | N                  | N   | N   | Y   | N   | N   | N  | Y   | --  | N   | Y  | Y  | Y  | Y  | N  | N  |
| Radat et al, 2005(52)                                        | N                  | N   | N   | Y   | N   | N   | N  | Y   | --  | N   | Y  | Y  | Y  | Y  | N  | N  |
| Zidverc-Trajkovic et al, 2007(54)                            | N                  | N   | N   | Y   | N   | Y   | N  | Y   | --  | N   | Y  | Y  | N  | Y  | Y  | N  |
| Chagas, 2015(43)                                             | Y                  | N   | N   | Y   | N   | N   | N  | Y   | N   | N   | Y  | Y  | N  | Y  | Y  | N  |

**Note:** \*abstract only
